# Supplementary material for: Effects of pH and Nutrients (Nitrogen) on Growth and Toxin Profile of the Ciguatera-Causing Dinoflagellate Gambierdiscus polynesiensis (Dinophyceae)
Source: PubMed Central journal article supplement (PMC7761829; doi:10.3390/toxins12120767), 2020-12-04
Supplement: toxins-12-00767-s001.pdf [file toxins-12-00767-s001.pdf]

## Supplementary Material: Effects of pH and Nutrients (Nitrogen) on Growth and Toxin Profile of the Ciguatera-Causing Dinoflagellate *Gambierdiscus polynesiensis* (Dinophyceae)

Sébastien Longo, Manoëlla Sibat, Hélène Taiana Darius, Philipp Hess and Mireille Chinain

**Table S1.** List of all *m/z* transitions required in scheduled MRM LC-MS/MS analysis to detect and quantify P-CTX compounds.

| COMPOUND                            | PARENT ION SPECIES                | <i>m/z</i> TRANSITION | CORRESPONDING COLOR |
|-------------------------------------|-----------------------------------|-----------------------|---------------------|
| P-CTX3B, P-CTX3C and isomer (4)     | [M+NH <sub>4</sub> ] <sup>+</sup> | 1040.6 → 1005.6       | black               |
|                                     | [M+H] <sup>+</sup>                | 1023.6 → 1005.6       | dark purple         |
|                                     |                                   | 125.1                 | flashy green        |
| P-CTX3B/C isomers group (1) (2) (3) | [M+NH <sub>4</sub> ] <sup>+</sup> | 1040.6 → 1005.6       | purple              |
|                                     | [M+H] <sup>+</sup>                | 1023.6 → 1005.6       | red                 |
|                                     |                                   | 125.1                 | turquoise           |
| P-CTX4A and P-CTX4B                 | [M+NH <sub>4</sub> ] <sup>+</sup> | 1078.6 → 1043.6       | dark blue           |
|                                     | [M+H] <sup>+</sup>                | 1061.6 → 1043.6       | Bordeaux red        |
|                                     |                                   | 125.1                 | khaki               |
| M-seco-P-CTX3C                      | [M+H] <sup>+</sup>                | 1041.6 → 1023.6       | black               |
|                                     |                                   | 1005.6                | blue                |
|                                     |                                   | 125.1                 | flashy green        |
| 2-OH-P-CTX3C                        | [M+NH <sub>4</sub> ] <sup>+</sup> | 1058.6 → 1023.6       | light blue          |
|                                     |                                   | 1005.6                | pink                |
|                                     |                                   | 125.1                 | orange              |
